1 **Classification:** Biological Sciences, Biochemistry

2

3 **A Novel Antenna Protein Complex in the Life Cycle of Cyanobacterial Photosystem II**

4

5 Daniel A. Weisz<sup>1°</sup>, Virginia M. Johnson<sup>1°</sup>, Dariusz M. Niedzwiedzki<sup>2</sup>, Min Kyung Shinn<sup>3,4</sup>, Haijun  
6 Liu<sup>1</sup>, Clécio F. Klitzke<sup>5‡</sup>, Michael L. Gross<sup>5</sup>, Robert E. Blankenship<sup>1</sup>, Timothy M. Lohman<sup>3</sup>,  
7 Himadri B. Pakrasi<sup>1\*</sup>

8 <sup>1</sup>Department of Biology, Washington University, St. Louis, MO 63130 USA

9 <sup>2</sup>Photosynthetic Antenna Research Center and Center for Solar Energy and Energy Storage,  
10 Washington University, St. Louis, MO 63130 USA

11 <sup>3</sup>Department of Biochemistry and Molecular Biophysics, Washington University School of  
12 Medicine, St. Louis, MO 63110 USA

13 <sup>4</sup>Department of Physics, Washington University, St. Louis, MO 63130 USA

14 <sup>5</sup>Department of Chemistry, Washington University, St. Louis, MO 63130 USA

15 \*Corresponding author. Email: pakrasi@wustl.edu, Phone: 314-935-6853

16 °These authors contributed equally to this study

17 ‡Current address: Universidad Austral de Chile, Valdivia, Región de los Ríos, Chile

## 1 **ABSTRACT**

2 In oxygenic photosynthetic organisms, photosystem II (PSII) is a unique membrane protein  
3 complex that catalyzes light-driven oxidation of water. PSII undergoes frequent damage due to its  
4 demanding photochemistry. However, many facets of its repair and reassembly following  
5 photodamage remain unknown. We have discovered a novel PSII subcomplex that lacks five key  
6 PSII core reaction center polypeptides: D1, D2, PsbE, PsbF, and PsbI. This pigment-protein  
7 complex does contain the PSII core antenna proteins CP47 and CP43, as well as most of their  
8 associated low-molecular-mass subunits, and the assembly factor Psb27. Immunoblotting  
9 analysis, multiple mass spectrometry techniques, and ultrafast spectroscopic results supported the  
10 absence of a functional reaction center in this chlorophyll-protein complex. We therefore refer to  
11 it as the ‘no reaction center’ complex (NRC). Additionally, genetic deletion of PsbO on the PSII  
12 lumenal side resulted in an increased NRC population, indicative of a faulty PSII repair scheme at  
13 the cellular level. Analytical ultracentrifugation studies and clear native acrylamide gel analysis  
14 showed that the NRC complex is a stable pigment-protein complex and not a mixture of free CP47  
15 and CP43 proteins. Our finding challenges the current model of the PSII repair cycle and implies  
16 an alternative PSII repair strategy. We propose that formation of this pigment-protein complex  
17 maximizes PSII repair economy by preserving an intact PSII core antenna shell in a single complex  
18 that is available for PSII reassembly, thus minimizing the risk of randomly diluting multiple  
19 recycling components in the thylakoid membrane following a photodamage event at the RC.

20 **Keywords:** Photosynthesis, repair cycle, protein turnover, mass spectrometry, ultrafast  
21 spectroscopy

## 22 **Significance statement**

23 Photosystem II (PSII) converts sunlight into chemical energy, powering nearly all life on Earth.  
24 The efficiency of this process is maximized under various environmental conditions by a frequent  
25 repair and reassembly cycle that follows inevitable PSII damage even during normal oxygenic  
26 photosynthesis. We have isolated a novel pigment protein PSII subcomplex in which, surprisingly,  
27 the reaction center (RC) components of PSII are absent. Formation of this stable chlorophyll-  
28 protein complex suggests a protective mechanism whereby longer-lived PSII subunits are  
29 ‘unplugged’ from the damaged RC to prevent harmful, aberrant photochemistry during RC repair.  
30 This finding provides intriguing new insight into how PSII is assembled and rebuilt to optimize its  
31 performance to optimally catalyze one of the most challenging reactions in biology.

## 1 Introduction

2 Photosystem II (PSII) is a large pigment-protein complex embedded in the thylakoid membranes  
3 of all oxygenic photosynthetic organisms: cyanobacteria, algae, and plants. PSII plays a central  
4 role in energy flow in the biosphere by harnessing sunlight to split water molecules into protons,  
5 electrons, and molecular oxygen, ultimately yielding the vital high-energy molecules ATP and  
6 NADPH. This process of converting solar energy to chemical energy powers nearly all life on  
7 Earth, while simultaneously producing the oxygen we breathe.

8 Crystal structures of functional PSII (1-6) have revealed that the water-splitting reaction is  
9 catalyzed by a  $Mn_4CaO_5$  (Mn) cluster bound to the luminal surface of PSII. D1 and D2, two ~30  
10 kDa transmembrane proteins, form a heterodimer at the center of PSII. They coordinate the  
11 primary electron transport chain cofactors and contribute most of the Mn-cluster ligands. D1 and  
12 D2 associate with the smaller (<10 kDa) subunits PsbE and PsbF ( $\alpha$ - and  $\beta$ -subunits of cytochrome  
13 *b<sub>559</sub>*) and PsbI. Together, these five proteins comprise the core “reaction center” (RC) complex,  
14 the smallest PSII subcomplex capable of light-induced charge separation (7). Surrounding the RC  
15 subunits are CP47 and CP43, two ~50 kDa proteins that bind chlorophyll *a* (Chl *a*) molecules and  
16 serve as antennae, harvesting and funneling light energy towards the RC to drive PSII  
17 photochemistry. Around 10 additional low-molecular mass (LMM) subunits bind to fully  
18 assembled PSII, contributing to the structural and functional optimization of the complex (8).  
19 Finally, functional PSII contains several membrane-extrinsic hydrophilic proteins (PsbO, PsbU,  
20 PsbV, and PsbQ in cyanobacteria) (9, 10), bound at the luminal surface of the complex, that  
21 stabilize the Mn cluster.

22 PSII undergoes frequent oxidative damage owing to the demanding electron-transfer chemistry it  
23 performs (11-13). D1 is damaged and replaced most frequently of all proteins in the complex,  
24 closely followed by D2 (14-17). CP47 and CP43 are, however, more long lived (15, 17). This  
25 damage leads to partial disassembly of PSII, replacement of each damaged subunit with a new  
26 copy, and reassembly of PSII, in an intricate process known as the PSII repair cycle (14, 18, 19)  
27 (Fig. S1). This cycle operates concurrently with *de novo* PSII synthesis, which involves stepwise  
28 assembly of PSII from component subcomplexes. Many accessory proteins, such as Psb27 and  
29 Psb28 (20-24), bind exclusively to particular PSII subcomplexes to aid in a specific aspect of  
30 assembly. Much effort has been invested in characterizing the various subcomplexes that form  
31 during the PSII life cycle, but because they are typically found in low abundance and only form  
32 transiently, many details remain unclear.

33 In this study, we describe the identification of a novel PSII subcomplex from the cyanobacterium  
34 *Synechocystis* sp. PCC 6803 (*Synechocystis* 6803). This subcomplex specifically lacks the five  
35 RC subunits, and therefore, we refer to it as the ‘no-RC’ (NRC) complex. We discuss the  
36 implications of this complex in the context of the PSII life cycle and propose that its formation  
37 maximizes the efficiency of PSII repair and minimizes collateral damage to components of PSII  
38 that were unharmed following an initial photodamage event.

## 1 RESULTS

### 2 *Isolation of a novel PSII subcomplex*

3 We purified PSII complexes from the His47 and  $\Delta psbO$ -His47 strains of *Synechocystis* 6803 by  
4 FPLC using a nickel affinity column. These complexes were then analyzed by high resolution  
5 clear native acrylamide gel electrophoresis (Fig. 1A). As expected, in the  $\Delta psbO$ -His47 strain, a  
6 major band was seen that represents the PSII monomer (PSII-M), whereas no PSII dimer was  
7 found as it is not formed in this strain (10, 24). Additionally, a green band just below the monomer  
8 was observed that corresponds to the RC47 complex previously observed in the literature (14, 19).  
9 In the His47 strain, a major band was seen that represents the PSII dimer (PSII-D), while PSII-M  
10 and the RC47 bands were also present. Interestingly, an additional green band of unknown identity  
11 was present at a lower molecular weight than the monomer in each strain. In-gel digestion  
12 followed by tandem mass spectrometry (MS) indicated sharply decreased D1, D2, and PsbE  
13 content in the lower molecular weight band from both strains compared to PSII-M (Table S1), and  
14 presence of CP47 and CP43, though other assay methods were needed (see below) for more  
15 reliable quantitative information.

16 To obtain a sufficient quantity for further characterization of the unknown complex, PSII  
17 preparations were then subjected to glycerol gradient ultracentrifugation to separate distinct His-  
18 CP47-containing complexes (Fig. 1B). Again as expected, in the  $\Delta psbO$ -His47 strain, a major  
19 band was seen that represents the PSII monomer (PSII-M), whereas no PSII dimer was found as it  
20 is not formed in this strain (10, 24), and in the His47 strain, a major band was seen that represents  
21 the PSII dimer (PSII-D) in addition to the monomer band. Consistent with the results in the clear  
22 native gel, a lower molecular weight chlorophyll-containing band was observed in each strain.  
23 This band was harvested and concentrated. When the purified lower molecular weight band from  
24 the  $\Delta psbO$  strain was run next to  $\Delta psbO$ -PSII by clear native gel electrophoresis, it co-migrated  
25 with the band observed initially (Fig. S2). Tandem MS was performed after in-solution digestion  
26 of the complex from  $\Delta psbO$  cells. The dominant PSII proteins were CP47 and CP43. According  
27 to the semi-quantitative information derived from such an experiment, levels of D1, D2, PsbE, and  
28 PsbF were markedly decreased compared to the corresponding PSII-M (Tables S2-S3), consistent  
29 with the results from in-gel digestion on the lower molecular weight band described above.

30 The 77-K absorption spectra of  $\Delta psbO$ -PSII-M and the novel complex were nearly identical (Fig.  
31 1C), with the exception that a small peak around 540 nm corresponding to pheophytin *a* (25) was  
32 absent in the spectrum of the new complex. Pheophytin *a* is a cofactor in the PSII electron-transfer  
33 chain and is coordinated by D1 and D2. SDS-PAGE analysis showed no band detectable for the  
34 core RC proteins D1 and D2 (Fig. 2A). It, however, contained the inner antenna subunits CP47  
35 and CP43, as well as Psb27, which binds to CP43 transiently during PSII assembly and repair (20,  
36 21, 26, 27). In functional PSII, chlorophylls (Chl) bound to CP47 and CP43 harvest light and  
37 transfer excitation energy to Chl on D1 and D2, where primary PSII photochemistry occurs. A  
38 subcomplex containing both antenna proteins but lacking the two RC subunits to which they  
39 transfer energy was a surprising finding.

1 Consistent with SDS-PAGE, immunoblotting analysis (Figs. 2B, 2C) showed no detectable level  
2 of D1 and D2 in the novel complex isolated from both the *ΔpsbO* and His47 strains. Additionally,  
3 PsbE, another member of the PSII RC complex, was also absent (7). Presence of CP43 and CP47  
4 in this complex, however, was confirmed, and the CP47-associated LMM subunit PsbH was  
5 detected as well. The MS results that showed severely decreased, but detectable, levels of D1 and  
6 D2 in the sample reflect the high sensitivity of the Q-Exactive mass spectrometry instrument and  
7 the inevitability of some impurities remaining in the sample following purification. The SDS-  
8 PAGE and immunoblot results show, however, that even if small amounts of D1 and D2 are present  
9 below their detection limits, they are not stoichiometric components of this complex.

10 For a more complete identification of the LMM subunits in this new complex, we employed MS  
11 to measure the mass of the intact protein components. We detected ten LMM subunits in the  
12 control *ΔpsbO*-PSII-M sample, whereas only seven of those ten were present in the new complex  
13 (Figs. 3, S3, Tables S4-S5). Remarkably, the three missing subunits are the three LMM  
14 components of the PSII RC: PsbE, PsbF, and PsbI. Taking our SDS-PAGE, immunoblot, and MS  
15 results together, we conclude that the novel subcomplex specifically lacks all five of the PSII RC  
16 components, D1, D2, PsbE, PsbF and PsbI, but contains the rest of the PSII subunits observed in  
17 the control PSII-M sample. We therefore refer to it as the “no-reaction center” (NRC) complex.  
18 The presence of NRC in the His47 strain, seen through native gel, glycerol gradient, mass  
19 spectrometry, and immunoblot characterization, demonstrates that this complex does not form as  
20 a result of the absence of PsbO in the *ΔpsbO*-His47 strain. The experiments described below were,  
21 therefore, performed using NRC from *ΔpsbO*-His47 cells owing to the higher yield obtainable in  
22 this strain.

### 23 *Determination of the size of the NRC complex*

24 Distributions of the Chl-containing species of the PSII-M and NRC samples were determined from  
25 sedimentation velocity experiments using analytical ultracentrifugation (AUC) (Fig. 4A). The  
26 NRC sample showed a major species at 6.1 S (peak b), the molecular weight (MW) of which was  
27 determined as  $167.0 \pm 5.3$  kDa in a subsequent sedimentation equilibrium experiment (Fig. 4B).  
28 A minor species at 2.9 S was also observed (Fig. 4A), with MW  $75.0 \pm 3.5$  kDa (Fig. 4B), which  
29 likely corresponds to dissociated CP47 (76 kDa) and/or CP43 (67 kDa) with their associated  
30 cofactors. For MW determination, the sedimentation equilibrium curves were analyzed using a  
31 two species fit based on the observation of two species from the sedimentation velocity  
32 experiments. The PSII-M sample showed a major species at 11.6 S (peak f), and three minor  
33 species at 2.9 S, 5.4 S, and 9.0 S. The MW of the major species was estimated as 436 kDa with a  
34 best-fit frictional coefficient ratio of 1.27, comparable to the MW of the PSII monomer determined  
35 in a previous study by Zouni and co-workers, using a similar method (28). The three minor species  
36 likely represent dissociation products.

### 37 *The NRC complex lacks a functional reaction center*

38 The absence of the RC proteins in NRC suggests that the complex cannot function as an RC. To  
39 test this hypothesis, we used ultrafast time-resolved fluorescence (TRF) measurements on the PSII-  
40 M and NRC samples. Both samples were excited at 625 nm, corresponding to a vibronic overtone

1 of the Chl *a* Q<sub>y</sub> band, and the Chl *a* fluorescence decay was monitored (Fig. 5A and B, shown as  
2 pseudo-color 2D profiles). The profiles revealed substantial differences between the two samples.  
3 The initial fluorescence profile of PSII-M, with a fluorescence maximum at ~680 nm, quickly  
4 evolved to a broader spectrum associated with another species with emission maximum at ~700  
5 nm, consistent with energy transfer from antennae to a trap (the RC). Fluorescence spectra profiles  
6 of Chl *a* in NRC, however, remained relatively constant over time.

7 The differences were further emphasized through kinetic analysis of the TRF data (Fig. 5C and  
8 D). Global analysis of the PSII-M and NRC spectra revealed two spectro-kinetic components  
9 (EAFS) for each sample (see Materials and Methods for more details). The faster PSII-M and  
10 NRC components, with lifetimes of 250 and 330 ps, respectively, resemble each other and  
11 correspond to excitation equilibration within the protein. The slower PSII-M component, with a  
12 lifetime of 1.6 ns, was red-shifted and reflects excitation-energy transfer from CP47 and CP43 to  
13 deep energetic traps in the RC. These PSII-M results closely mimic those obtained for PSII core  
14 complexes from the cyanobacterium *Thermosynechococcus vulcanus* under similar conditions  
15 (29). The slower NRC component, however, with a lifetime of 4.6 ns, was very similar to the fast  
16 NRC component, suggesting that both originate from the same species. The lifetime of 4.6 ns  
17 closely resembled that obtained for isolated CP47 and CP43 proteins (30), implying that no further  
18 excitation energy transfer occurs in the NRC complex, and this component corresponds to intrinsic  
19 decay of excited Chl *a*. Overall, these results demonstrated that excitation energy in PSII-M that  
20 was initially localized on Chl *a* bound to CP47 and CP43, was efficiently transferred to the RC.  
21 In contrast, no such RC energy trap exists in the NRC complex, and excitation energy remained  
22 localized on CP47 and CP43 until it decayed intrinsically.



## 1 DISCUSSION

2 In this study, we discovered and characterized the “no-reaction center” (NRC) complex, a PSII  
3 subcomplex that contains the inner antenna subunits CP43 and CP47, Psb27, and seven LMM  
4 subunits, but is missing the five subunits that comprise the PSII RC: D1, D2, PsbE, PsbF, and PsbL.  
5 An assembled complex without all five RC components is remarkable and has not been described  
6 before. Through analytical sedimentation experiments, we determined the MW of the NRC  
7 complex to be  $167.0 \pm 5.3$  kDa. This value is in between the sum of the apo (153 kDa)- and holo  
8 (194 kDa)- masses of the NRC proteins, indicating that some NRC cofactors with D1 or D2  
9 interfaces may be destabilized in their absence. The determined MW is also close to the sum of  
10 the apparent masses of the individual CP43 and CP47 pre-complexes (around 180 kDa) measured  
11 previously (31). These results are not consistent with the NRC sample comprising a mixture of  
12 separate CP43 and CP47 pre-complexes, as each of these pre-complexes have MWs roughly half  
13 of the determined MW. We can also rule out homodimers of the CP43 and CP47 pre-complexes.  
14 Given the respective sizes of the two pre-complexes (31), such dimers would differ in mass by  
15 around 40 kDa, not consistent with the observed single, narrow, symmetrical major peak (Fig. 4,  
16 peak “b”) indicating a single species. Homodimers were also not detected during previous  
17 characterization of the pre-complexes (31). Overall, the analytical sedimentation results indicate  
18 that the NRC complex is a single species likely composed of a single copy of each of the PSII  
19 subunits identified in it.

20 The LMM subunits identified in NRC are consistent with the PSII crystal structures (2, 4, 5) in  
21 that all share interfaces with either CP43 or CP47 (except PsbY, which interfaces with another  
22 NRC subunit, PsbX). PsbH, PsbL, and PsbT were previously identified in the CP47 pre-complex,  
23 and PsbK in the CP43 pre-complex (31), consistent with our results. The presence of Psb27 is  
24 reasonable because it binds to CP43 (20, 27, 32), and the absence of Psb28 (Figs. 2B, 2C) is also  
25 reasonable as Psb28 associates closely with PsbE and PsbF (24) and would not be expected to bind  
26 in their absence.

27 In the crystal structures of mature PSII, D1 and D2 bridge the gap in the transmembrane region  
28 between CP43 and CP47. In their absence, the NRC subunits do not form a continuous structure,  
29 except for a very small overlap between PsbL and PsbT at the cytosolic surface. A significant  
30 CP43-CP47 interface would likely be necessary to preserve the structural integrity of this complex  
31 and could occur with CP43 and CP47 approaching each other and at least partially closing the gap  
32 left by D1 and D2.

33 Within the PSII life cycle, NRC could form during *de novo* synthesis and/or during the repair cycle  
34 (Fig. 6). During *de novo* synthesis, the complex would form as a spontaneous merger between  
35 newly synthesized CP43 and CP47 pre-complexes, from which CP47 followed by CP43 would  
36 attach to nascent RC complexes according to the current model (14, 33). The low abundance of  
37 NRC in the wild-type strain has likely prevented its detection until now. Many studies have used  
38 mutants that accumulate early assembly intermediates, but these valuable studies have often used  
39 either a  $\Delta$ CP43 or a  $\Delta$ CP47 strain (27, 34, 35), further preventing detection of the complex.

1 The second possibility, not mutually exclusive with the first, is that NRC forms during the repair  
2 cycle (Fig. 6), after PSII undergoes photodamage (most often at the D1 subunit). The repair steps  
3 are: 1) dissociation of the extrinsic proteins PsbO, PsbU, PsbV, and PsbQ (36), 2) rebinding of  
4 Psb27 (21), 3) monomerization of the complex (36), 4) an undefined further dissociation step (19),  
5 5) D1 degradation (37-39), 6) insertion of a new D1 copy (14), and 7) PSII reassembly (14).

6 Within this known framework, NRC formation would most logically occupy step 4, the undefined  
7 dissociation step, with the damaged Psb27-PSII monomer splitting into RC and NRC components  
8 (Fig. 6). An implication is that D1 replacement would occur at the level of the RC complex (Fig.  
9 6), not at RC47 as has been previously proposed (Fig. S1) (14, 19, 40). Meanwhile, CP43 and  
10 CP47 would be sequestered efficiently in one location, ready to be recycled back into PSII after  
11 repair. Though D1 is turned over most frequently, D2 has the second-highest turnover rate,  
12 approximately double that of CP43 and over three times that of CP47 (15). Dissociation of PSII  
13 into RC and NRC complexes following photodamage would allow maximal access for proteases  
14 to both D1 and D2, whereas, by interacting closely, CP43 and CP47 would shield each other from  
15 such protease attack (41). The recent interesting finding that PSII can remain stable and fully  
16 intact following Mn cluster removal (42) supports the notion that there may be an important  
17 efficiency benefit to maintaining a PSII subcomplex, once assembled, in as intact a state as  
18 possible, while still allowing for necessary repair to occur.

19 Damaged PSII is a liability because aberrant PSII photochemistry could result in further oxidative  
20 damage to the complex. During PSII assembly, D1 processing is a checkpoint that prevents  
21 premature formation of the highly oxidizing Mn cluster, which could result in damage to nearby  
22 subunits (26). The dissociation of the extrinsic proteins and the rebinding of Psb27 following  
23 photodamage likely achieves the same goal: inactivation of the Mn cluster at a time when it could  
24 only cause further damage. Perhaps the formation of the NRC complex can be understood in a  
25 similar manner. In addition to being an efficient disassembly/reassembly mechanism, separating  
26 into RC and NRC complexes following initial damage to D1 or D2 could serve a twofold protective  
27 purpose: 1) it lowers the total excitation energy reaching the RC by “unplugging” it from the CP47  
28 and CP43 antenna subunits, and 2) it prevents aberrant PSII photochemistry from causing  
29 collateral damage to the NRC components, which are unlikely to have been harmed in the initial  
30 photodamage event. Future structural studies of the NRC Chl-protein complex are expected to  
31 shed light on the dynamic process during the PSII repair cycle.



## 1 **Materials and Methods**

### 2 *Cell culture, PSII purification and protein analysis*

3 Generation of the  $\Delta psbO$ -His47 strain was reported previously (10). The HT3 (His47) strain was  
4 a kind gift from Dr. Terry Bricker (Louisiana State University, Baton Rouge, LA) (43).  
5 Cyanobacterial strains were grown in BG11 medium at 30 °C under 40  $\mu\text{mol photons m}^{-2} \text{s}^{-1}$ . The  
6 growth media were supplemented with 10  $\mu\text{g/mL}$  spectinomycin and 5  $\mu\text{g/mL}$  gentamicin ( $\Delta psbO$ -  
7 His47 strain) or 5  $\mu\text{g/mL}$  gentamicin (His47 strain). Histidine-tagged PSII complexes were  
8 purified by FPLC, as described previously (44), with minor modifications, and were stored in 25%  
9 glycerol (wt/vol), 10 mM  $\text{MgCl}_2$ , 5 mM  $\text{CaCl}_2$ , 50 mM MES buffer pH 6.0.

10 Following FPLC purification, PSII complexes were purified further by glycerol gradient  
11 ultracentrifugation, performed as described previously (24). To prepare one centrifuge tube, 0.6  
12 mL 50% glycerol in RB buffer pH 6.5 was layered onto the bottom of the tube. The gradient was  
13 made from 6 mL each of stock solutions of 5% and 30% glycerol in RB buffer pH 6.5 containing  
14 0.04%  $\beta$ -dodecyl maltoside. The stock solutions were added into the two chambers of a gradient  
15 maker connected to a peristaltic pump and were allowed to mix gradually as the pump delivered  
16 the mixture into the tube just below the top of the 50% glycerol layer. PSII sample containing 100  
17  $\mu\text{g}$  Chl *a* was diluted 1:5 into RB buffer pH 6.5 (final concentration 5% glycerol), then loaded onto  
18 the top of the gradient. Ultracentrifugation was performed at 180,000 *g* overnight at 4 °C. After  
19 centrifugation, the bands were harvested and concentrated by using Vivaspin 500 centrifugal  
20 concentrators (50 kDa cutoff) (Vivaproducts, Littleton, MA). The NRC complex was obtained in  
21 this manner consistently from numerous distinct biological preparations. Protein electrophoresis  
22 was performed as described previously (45, 46). For immunoblotting, gels were transferred onto  
23 a PVDF membrane (MilliporeSigma, Burlington, MA) followed by probing with specific antisera.  
24 Immunoblot imaging was performed with chemiluminescence reagents (MilliporeSigma,  
25 Burlington, MA) on a LI-COR Odyssey Fc (LI-COR Biotechnology, Lincoln, NE).

### 26 *Clear native polyacrylamide gel electrophoresis*

27 High resolution clear native PAGE was performed as described in (47). 1.5x160x160 mm clear  
28 native polyacrylamide gel, 4-13%, was prepared using a gradient maker. Protein samples  
29 containing 10  $\mu\text{g}$  of Chl *a* were loaded in each lane. Gel was run at 4mA for 16 hours at 4° C.  
30 Gels were imaged using a Li-COR Odyssey Fc (LI-COR Biotechnology, Lincoln, NE) using the  
31 700 nm channel to visualize chlorophyll fluorescence.

### 32 *In-gel digestion and LC-MS/MS analysis*

33 Protein samples were excised from the clear native polyacrylamide gel, destained and dehydrated  
34 with (1:1) 100mM ammonium bicarbonate:acetonitrile and digested in-gel with 13 ng/uL trypsin  
35 (Sigma) in 1mM TEABC. Following digestion, sample was extracted in 1% formic acid and  
36 subjected to LC-MS/MS.

37 Aliquots (5  $\mu\text{L}$ , ~100 pmoles) of the peptide samples were separated online using a Dionex  
38 Ulimite 3000 RSLCnano pump and autosampler (Thermo Fisher Scientific, Waltham, MA, USA)

1 and a column packed in-house utilizing ProntoSIL C18AQ, 3  $\mu\text{m}$  particle size, 120  $\text{\AA}$  pore size  
2 (Bischoff, Stuttgart, Germany), in a 75  $\mu\text{m}$  X 15 cm capillary. The mobile phase consisted of A:  
3 0.1% formic acid in water and B: 0.1% formic acid in 80% acetonitrile/20% water (Thermo Fisher  
4 Scientific, Waltham, MA, USA). At a flow rate of 500 nL/min, the gradient was held for 5 min at  
5 2% B and slowly ramped to 17% B over the next 30 min, increasing to 47% B over the next 30  
6 min and then finally increasing to 90% B over 30 min and held at 90% for 10 min. The column  
7 was then allowed to re-equilibrate for 60 min with a flow of 2% B in preparation for the next  
8 injection.

9 The separated peptides were analyzed on-line by using a Q-Exactive Plus mass spectrometer  
10 (Thermo Fisher Scientific, Waltham, MA, USA) operated in standard data-dependent acquisition  
11 mode controlled by Xcalibur version 4.0.27.19. Precursor-ion activation was set with an isolation  
12 width of  $m/z$  1.0 and with two collision energies toggled between 25 and 30%. The mass resolving  
13 power was 70 K for precursor ions and 17.5 K for product ions (MS2).

14 The raw data were analyzed using PEAKS Studio X (version 10.0, Bioinformatics Solution Inc.,  
15 Waterloo, ON, Canada, [www.bioinform.com](http://www.bioinform.com)) and Protein Metrics Byonic and Byologic (Protein  
16 Metrics Inc., Cupertino, CA, [www.proteinmetrics.com](http://www.proteinmetrics.com)) (48). PEAKS was used in the *de novo*  
17 mode followed by DB, PTM, and SPIDER modes. Search parameters included a precursor-ion  
18 mass tolerance of 10.0 ppm and a fragment-ion mass tolerance of 0.02 Da. Variable modifications  
19 included all built-in PTMs. The maximum allowed modifications per peptide were 3; and the  
20 maximum missed cleavages were 2; false discovery rate, 0.1%. SPIDER (function) was used to  
21 identify unknown spectra by considering homology searches, sequence errors, and residue  
22 substitutions to yield a more confident identification.

23 Byonic searches employed the same database but used a precursor ion mass tolerance of 20 ppm  
24 and a fragment ion mass tolerance of 60 ppm with a maximum of 2 missed cleavages. Wildcard  
25 searches of  $\pm 200$  Da were employed to look for modifications in addition to regular PTM analysis.  
26 Protein false discovery rate threshold was determined by the score of the highest ranked decoy  
27 protein identified. All of the search results were combined in Byologic for validation.

#### 28 *In-solution digestion and LC-MS/MS analysis*

29 Samples each containing 2  $\mu\text{g}$  Chl *a* of  $\Delta\text{psbO}$ -PSII-M and  $\Delta\text{psbO}$ -NRC were precipitated using  
30 the 2D Cleanup Kit (GE Healthcare, Chicago, IL) according to the manufacturer's instructions.  
31 The pellets were resuspended in 20  $\mu\text{L}$  8M urea, 50 mM ammonium bicarbonate (ABC). Lys C  
32 was added at a 1:50 w/w protease:sample ratio and incubated at 37  $^{\circ}\text{C}$  for 2 hours. Samples were  
33 diluted to 1M urea with 50 mM ABC and trypsin was added at a 1:50 w/w protease:sample ratio.  
34 The samples were incubated overnight at 37  $^{\circ}\text{C}$ , then acidified to 1% formic acid and centrifuged  
35 to remove any insoluble material.

36 Aliquots (5  $\mu\text{L}$ ) of the digests were analyzed by LC-MS/MS as described in (24) with the  
37 following modifications: the LC gradient ran from 2-90% Solvent B with the following steps- 12  
38 min at 2% B, 33 min linear increase to 15% B, 30 min linear increase to 50% B, 15 min linear  
39 increase to 90% B, 9 min hold at 90% B, 1 min linear decrease to 2% B, and 30 min hold at 2%  
40 B; scan range was  $m/z$  380-2200; for data-dependent MS/MS scans, resolution was 35,000 for

1 ions at  $m/z$  200 and AGC target was set at  $2 \times 10^5$  ions; and the top 10 ions were fragmented by  
2 HCD.

3 The raw data were loaded into PEAKS (version 8.5, Bioinformatics Solution Inc., Waterloo, ON)  
4 for protein identification. The data were searched against a database of the *Synechocystis* 6803  
5 proteome using the built-in fusion decoy database for false discovery rate calculation (49). Search  
6 parameters were as follows: precursor-ion mass tolerance, 10.0 ppm; fragment-ion mass tolerance,  
7 0.02 Da; variable modifications, all built-in modifications; maximum variable modifications per  
8 peptide, 3; maximum missed cleavages, 2; maximum nonspecific cleavages, 0; false discovery  
9 rate, 0.1%.

#### 10 *Mass spectrometry of intact proteins*

11  $\Delta O$ -M and  $\Delta O$ -NRC samples, each containing 1.4  $\mu\text{g}$  Chl *a*, were precipitated using the 2D Clean-  
12 up kit (GE Healthcare, Chicago, IL), following the manufacturer's instructions. The pellets were  
13 resuspended in 100  $\mu\text{L}$  70% acetone, 19% water, 10% isopropanol, 1% formic acid v/v (31),  
14 diluted 1:3 in the resuspension solution, and infused directly into a Synapt G2 HDMS mass  
15 spectrometer (Waters, Milford, MA) at a flow rate of 500 nL/min by means of a syringe pump  
16 PHD Ultra (Harvard Apparatus, Holliston, MA). The mass spectrometer, equipped with a  
17 nanoelectrospray ionization source, was operated in sensitive 'V' mode with 10,000 mass  
18 resolving power (full-width at half-maximum). Positive-ion formation was achieved by applying  
19 a capillary voltage of 2.6 kV. The sampling and extraction cone voltages were 40 and 2 V,  
20 respectively, and the source temperature was 30 °C. Mass spectra were acquired between  $m/z$  100  
21 and 4,000 with an acquisition rate of one spectrum per sec. Data processing was with MassLynx  
22 4.1 (Waters, Milford, MA). Final spectra were the average of 300 spectra collected in profile mode  
23 and converted to centroid data.

24 For LC-MS/MS analysis,  $\Delta O$ -M and  $\Delta O$ -NRC samples were prepared as described above for  
25 direct infusion. An aliquot (5  $\mu\text{L}$ , ~1-2 pmol of intact proteins) was loaded onto a trap column  
26 (180  $\mu\text{m}$  x 2 cm, C18 Symmetry, 5  $\mu\text{m}$ , 100Å, Waters, Milford, MA) using solvent A (water with  
27 0.1% formic acid). Peptides were eluted from a reverse phase C18 column (ProntonSIL 3 $\mu\text{m}$ ,  
28 120Å) 75  $\mu\text{m}$  x 150 mm by increasing the fraction of solvent B (80% acetone, 20% water, and  
29 0.1% formic acid). The gradient was supplied by a Dionex Ultimate 3000 instrument (Thermo  
30 Scientific, Inc., Sunnyvale, CA) and run from 2 to 17% solvent B over 65 min and then to 40%  
31 solvent B for 15 min, and then to 90% solvent B for 15 min at a rate of 500 nL/min followed by  
32 15 min re-equilibration step with 98% solvent A. The Q-Exactive Plus spectrometer (Thermo  
33 Fisher Scientific, Waltham, MA, USA) was operated in standard mode with an inclusion list of all  
34 the LMM subunits observed by direct infusion on the Synapt G2 (Table S4). Peptide mass spectra  
35 ( $m/z$  range of 350-2000) were acquired at a high mass resolving power (7000 for ions at  $m/z$  200)  
36 with the Fourier transform (FT) mass spectrometer. Precursor activation in HCD was performed  
37 with an isolation width of  $m/z$  1.0 and a normalized collision energy of 30%. Default charge state  
38 was 3+ with charge exclusion of 1 and >8.

39 The LC-MS/MS raw data were submitted to the Protein Metrics (PMI) software package for  
40 analysis (48). Database searching was performed by the Byonic software using the *Synechocystis*

1 6803 phycobilisome and reaction centers protein database and a decoy database containing  
2 reversed protein sequences. Search parameters were: precursor ion mass tolerance 20 ppm,  
3 fragment ion mass tolerance 60 ppm, 0 cleavage sites, common post-translational modifications,  
4 and automatic peptide score cut. Protein false discovery rate threshold was determined by the  
5 score of the highest ranked decoy protein identified. The search results were combined in the  
6 Byologic software for validation and extraction of ion chromatograms with a mass window of 20  
7 ppm. Manual quality control was performed using XCalibur Qual Browser assisted by the  
8 Protein Prospector package (<http://prospector.ucsf.edu/prospector/mshome.htm>) and Magtran  
9 (50).

#### 10 *Ultrafast time-resolved fluorescence spectroscopy*

11 All spectroscopic measurements were carried out at 77 K, using a VNF-100 liquid nitrogen  
12 cryostat (Janis, USA). The samples ( $\Delta O$ -M and  $\Delta O$ -NRC) were diluted in 60:40 v/v glycerol:RB  
13 buffer with 0.04% DM, that after cooling, formed fully transparent glass. Steady-state absorption  
14 spectra were recorded on a UV-1800 spectrophotometer (Shimadzu). Time-resolved fluorescence  
15 (TRF) imaging was performed using a universal streak camera system (Hamamatsu Corporation,  
16 Japan) based on N51716-04 streak tube and A6365-01 spectrograph from Bruker Corporation  
17 (Billerica, MA) coupled to an ultrafast laser system, described previously (51). The repetition rate  
18 of the exciting laser was 4 MHz, corresponding to  $\sim 250$  ns between subsequent pulses. The  
19 excitation beam was depolarized, focused on the sample in a circular spot of  $\sim 1$  mm diameter and  
20 set to a wavelength of 625 nm and very low photon flux of  $\sim 10^{10}$  photons/cm<sup>2</sup> per pulse. The  
21 emission was measured at a right angle to the excitation beam with a long-pass 645-nm filter placed  
22 at the entrance slit of the spectrograph. The integrity of the samples was examined by observing  
23 the photon counts in real-time over the time course of the experiment. These were constant,  
24 indicating no detectable sample photodegradation. Prior to further analysis, all TRF datasets were  
25 subjected to singular value decomposition (SVD), a least-squares estimator of the original data  
26 leading to significant noise reduction (52).

27  
28 The data were globally fitted with application of a simple fitting model that assumes irreversible  
29 direction of excitation decay from fastest to slowest decaying states. It is commonly called a  
30 sequential model, and spectro-kinetic components obtained from this fitting are typically called  
31 evolution-associated spectra (EAS). This nomenclature was adopted for the TRF analysis and the  
32 fitting results of those data are called evolution associated fluorescence spectra (EAFS) (53).

#### 33 *Analytical sedimentation*

34 After sample concentration following glycerol gradient ultracentrifugation (see above),  $\Delta O$ -M and  
35  $\Delta O$ -NRC samples were buffer exchanged into RB buffer pH 6.5 containing 5% glycerol.  
36 Sedimentation velocity experiments were performed with an Optima XL-A analytical  
37 ultracentrifuge and An50Ti rotor (Beckman Instruments, Fullerton, CA) at 42,000 rpm (25 °C) as  
38 described previously (54). The experiment was performed at 4 and 13  $\mu\text{g/mL}$  Chl *a*, while  
39 monitoring absorbance at 437 nm, with the results consistent at both concentrations. Data were  
40 analyzed using SEDFIT (55), to obtain *c*(*s*) distributions. The *c*(*s*) distribution function defines the  
41 populations of species with different sedimentation rates (sizes) and represents a variant of the

1 distribution of Lamm equation solutions (55). The density and viscosity of the RB buffer at 25° C  
2 were determined using SEDNTERP. 0.76 mL/g was used as the partial specific volume (28).  
3 Sedimentation equilibrium experiments were performed with NRC sample at the three indicated  
4 speeds (25 °C) starting at the lowest and finishing at the highest speed as described previously  
5 (56). 110 µL of the NRC sample at the same concentration used for the sedimentation velocity  
6 experiments and 120 µL of the buffer were loaded to an Epon charcoal-filled six-channel  
7 centerpiece. Absorbance data were collected at intervals of 0.003 cm in the step mode with five  
8 averages per step. Data were edited using SEDFIT to extract concentration profiles from each  
9 chamber and analyzed using SEDPHAT with the Species Analysis with Mass Conservation model  
10 (57).

1 **Acknowledgements:** We thank Dr. Alexander Kozlov for helpful discussions. This work was  
2 supported by the Chemical Sciences, Geosciences, and Biosciences Division, Office of Basic  
3 Energy Sciences, Office of Science, U.S. Department of Energy (DOE) (Grant DE-FG02-  
4 99ER20350 to H.B.P.); the Photosynthetic Antenna Research Center, an Energy Frontier  
5 Research Center funded by the U.S. DOE, Office of Basic Energy Sciences (Grant DE-SC  
6 0001035 to H.B.P., R.E.B., and M.L.G.); NIH Grant P41GM103422 to M.L.G. and NIH Grant  
7 GM030498 to T.M.L. V.M.J was supported by a training grant T32 EB014855 from the  
8 National Institute of Biomedical Imaging and Bioengineering, NIH.

9

## 10 **Supplementary Materials**

11 Figs. S1-S3

12 Tables S1-S5



## 1   **References**

- 2   1.    Suga M, *et al.* (2015) Native structure of photosystem II at 1.95 Å resolution viewed by  
3       femtosecond X-ray pulses. *Nature* 517(7532):99-103.
- 4   2.    Suga M, *et al.* (2017) Light-induced structural changes and the site of O=O bond  
5       formation in PSII caught by XFEL. *Nature* 543(7643):131-135.
- 6   3.    Kupitz C, *et al.* (2014) Serial time-resolved crystallography of photosystem II using a  
7       femtosecond X-ray laser. *Nature* 513(7517):261-265.
- 8   4.    Umena Y, Kawakami K, Shen JR, & Kamiya N (2011) Crystal structure of oxygen-  
9       evolving photosystem II at a resolution of 1.9 Å. *Nature* 473(7345):55-60.
- 10  5.    Zouni A, *et al.* (2001) Crystal structure of photosystem II from *Synechococcus elongatus*  
11       at 3.8 Å resolution. *Nature* 409(6821):739-743.
- 12  6.    Young ID, *et al.* (2016) Structure of photosystem II and substrate binding at room  
13       temperature. *Nature* 540(7633):453-457.
- 14  7.    Nanba O & Satoh K (1987) Isolation of a photosystem II reaction center consisting of D-  
15       1 and D-2 polypeptides and cytochrome *b*-559. *Proc Natl Acad Sci U S A* 84:109-112.
- 16  8.    Shi LX, Hall M, Funk C, & Schroder WP (2012) Photosystem II, a growing complex:  
17       updates on newly discovered components and low molecular mass proteins. *Biochim*  
18       *Biophys Acta* 1817(1):13-25.
- 19  9.    Roose JL, Frankel LK, Mummadisetti MP, & Bricker TM (2016) The extrinsic proteins  
20       of photosystem II: update. *Planta* 243(4):889-908.
- 21  10.   Liu H, *et al.* (2014) MS-based cross-linking analysis reveals the location of the PsbQ  
22       protein in cyanobacterial photosystem II. *Proc Natl Acad Sci U S A* 111(12):4638-4643.
- 23  11.   Weisz DA, Gross ML, & Pakrasi HB (2017) Reactive oxygen species leave a damage  
24       trail that reveals water channels in Photosystem II. *Sci Adv* 3(11):eaao3013.
- 25  12.   Kale R, *et al.* (2017) Amino acid oxidation of the D1 and D2 proteins by oxygen radicals  
26       during photoinhibition of Photosystem II. *Proc Natl Acad Sci U S A* 114(11):2988-2993.
- 27  13.   Pospisil P (2016) Production of Reactive Oxygen Species by Photosystem II as a  
28       Response to Light and Temperature Stress. *Front Plant Sci* 7:1950.
- 29  14.   Nickelsen J & Rengstl B (2013) Photosystem II assembly: from cyanobacteria to plants.  
30       *Annu Rev Plant Biol* 64:609-635.
- 31  15.   Yao DC, Brune DC, & Vermaas WF (2012) Lifetimes of photosystem I and II proteins in  
32       the cyanobacterium *Synechocystis* sp. PCC 6803. *FEBS Lett* 586(2):169-173.
- 33  16.   Komenda J & Masojidek J (1995) Functional and structural changes of the photosystem  
34       II complex induced by high irradiance in cyanobacterial cells. *European Journal of*  
35       *Biochemistry* 233:677-682.
- 36  17.   Christopher DA & Mullet JE (1994) Separate photosensory pathways co-regulate blue  
37       light/ultraviolet-A-activated *psbD-psbC* transcription and light-induced D2 and CP43  
38       degradation in barley (*Hordeum vulgare*) chloroplasts. *Plant Physiol* 104:1119-1129.
- 39  18.   Weisz DA, Gross ML, & Pakrasi HB (2016) The Use of Advanced Mass Spectrometry to  
40       Dissect the Life-Cycle of Photosystem II. *Front Plant Sci* 7:617.
- 41  19.   Komenda J, Sobotka R, & Nixon PJ (2012) Assembling and maintaining the Photosystem  
42       II complex in chloroplasts and cyanobacteria. *Curr Opin Plant Biol* 15(3):245-251.
- 43  20.   Liu H, Huang RY, Chen J, Gross ML, & Pakrasi HB (2011) Psb27, a transiently  
44       associated protein, binds to the chlorophyll binding protein CP43 in photosystem II  
45       assembly intermediates. *Proc Natl Acad Sci U S A* 108(45):18536-18541.

- 1 21. Grasse N, *et al.* (2011) Role of novel dimeric Photosystem II (PSII)-Psb27 protein  
2 complex in PSII repair. *J Biol Chem* 286(34):29548-29555.
- 3 22. Roose JL & Pakrasi HB (2008) The Psb27 protein facilitates manganese cluster assembly  
4 in photosystem II. *J Biol Chem* 283(7):4044-4050.
- 5 23. Dobakova M, Sobotka R, Tichy M, & Komenda J (2009) Psb28 protein is involved in the  
6 biogenesis of the photosystem II inner antenna CP47 (PsbB) in the cyanobacterium  
7 *Synechocystis* sp. PCC 6803. *Plant Physiol* 149(2):1076-1086.
- 8 24. Weisz DA, *et al.* (2017) Mass spectrometry-based cross-linking study shows that the  
9 Psb28 protein binds to cytochrome b559 in Photosystem II. *Proc Natl Acad Sci U S A*  
10 114(9):2224-2229.
- 11 25. Rögner M, Chishold DA, & Diner BA (1991) Site-directed mutagenesis of the *psbC* gene  
12 of Photosystem II: Isolation and functional characterization of CP43-less Photosystem II  
13 core complexes. *Biochemistry* 30:5387-5395.
- 14 26. Liu H, Roose JL, Cameron JC, & Pakrasi HB (2011) A genetically tagged Psb27 protein  
15 allows purification of two consecutive photosystem II (PSII) assembly intermediates in  
16 *Synechocystis* 6803, a cyanobacterium. *J Biol Chem* 286(28):24865-24871.
- 17 27. Komenda J, *et al.* (2012) The Psb27 assembly factor binds to the CP43 complex of  
18 photosystem II in the cyanobacterium *Synechocystis* sp. PCC 6803. *Plant Physiol*  
19 158(1):476-486.
- 20 28. Zouni A, *et al.* (2005) Size determination of cyanobacterial and higher plant Photosystem  
21 II by gel permeation chromatography, light scattering, and ultracentrifugation.  
22 *Biochemistry* 44:4572-4581.
- 23 29. Shibata Y, Nishi S, Kawakami K, Shen JR, & Renger T (2013) Photosystem II does not  
24 possess a simple excitation energy funnel: time-resolved fluorescence spectroscopy meets  
25 theory. *J Am Chem Soc* 135(18):6903-6914.
- 26 30. Casazza AP, Szczepaniak M, Muller MG, Zucchelli G, & Holzwarth AR (2010) Energy  
27 transfer processes in the isolated core antenna complexes CP43 and CP47 of photosystem  
28 II. *Biochim Biophys Acta* 1797(9):1606-1616.
- 29 31. Boehm M, *et al.* (2011) Investigating the early stages of photosystem II assembly in  
30 *Synechocystis* sp. PCC 6803: isolation of CP47 and CP43 complexes. *J Biol Chem*  
31 286(17):14812-14819.
- 32 32. Cormann KU, Moller M, & Nowaczyk MM (2016) Critical Assessment of Protein Cross-  
33 Linking and Molecular Docking: An Updated Model for the Interaction Between  
34 Photosystem II and Psb27. *Front Plant Sci* 7:157.
- 35 33. Heinz S, Liauw P, Nickelsen J, & Nowaczyk M (2016) Analysis of photosystem II  
36 biogenesis in cyanobacteria. *Biochim Biophys Acta* 1857(3):274-287.
- 37 34. Boehm M, *et al.* (2012) Subunit composition of CP43-less photosystem II complexes of  
38 *Synechocystis* sp. PCC 6803: implications for the assembly and repair of photosystem II.  
39 *Philos Trans R Soc Lond B Biol Sci* 367(1608):3444-3454.
- 40 35. Komenda J, *et al.* (2004) Accumulation of the D2 protein is a key regulatory step for  
41 assembly of the photosystem II reaction center complex in *Synechocystis* PCC 6803. *J*  
42 *Biol Chem* 279(47):48620-48629.
- 43 36. Mabbitt PD, Wilbanks SM, & Eaton-Rye JJ (2014) Structure and function of the  
44 hydrophilic Photosystem II assembly proteins: Psb27, Psb28 and Ycf48. *Plant Physiol*  
45 *Biochem* 81:96-107.

- 1 37. Komenda J, *et al.* (2006) The FtsH protease slr0228 is important for quality control of  
2 Photosystem II in the thylakoid membrane of *Synechocystis* sp. PCC 6803. *Journal of*  
3 *Biological Chemistry* 281:1145-1151.
- 4 38. Sacharz J, *et al.* (2015) Sub-cellular location of FtsH proteases in the cyanobacterium  
5 *Synechocystis* sp. PCC 6803 suggests localised PSII repair zones in the thylakoid  
6 membranes. *Molecular Microbiology* 96:448-462.
- 7 39. Boehm M, *et al.* (2012) Subunit organization of a *Synechocystis* hetero-oligomeric  
8 thylakoid FtsH complex involved in Photosystem II repair. *Plant Cell* 24:3669-3683.
- 9 40. Nixon PJ, Barker M, Boehm M, de Vries R, & Komenda J (2005) FtsH-mediated repair  
10 of the photosystem II complex in response to light stress. *J Exp Bot* 56(411):357-363.
- 11 41. Krynicka V, Shao S, Nixon PJ, & Komenda J (2015) Accessibility controls selective  
12 degradation of photosystem II subunits by FtsH protease. *Nat Plants* 1:e15168.
- 13 42. Zhang M, *et al.* (2017) Structural insights into the light-driven auto-assembly process of  
14 the water-oxidizing Mn<sub>4</sub>CaO<sub>5</sub>-cluster in photosystem II. *eLIFE* 6:1-20.
- 15 43. Bricker TM, Morvant J, Masri N, Sutton HM, & Frankel LK (1998) Isolation of a highly  
16 active Photosystem II preparation from *Synechocystis* 6803 using a histidine-tagged  
17 mutant of CP 47. *Biochim Biophys Acta* 1409:50-57.
- 18 44. Kashino Y, *et al.* (2002) Proteomic analysis of a highly active Photosystem II preparation  
19 from the cyanobacterium *Synechocystis* sp. PCC 6803 reveals the presence of novel  
20 polypeptides. *Biochemistry* 41:8004-8012.
- 21 45. Kashino Y, Koike H, & Satoh K (2001) An improved sodium dodecyl sulfate-  
22 polyacrylamide gel electrophoresis system for the analysis of membrane protein  
23 complexes. *Electrophoresis* 22:1004-1007.
- 24 46. Kashino Y, *et al.* (2002) Low-molecular-mass polypeptide components of a Photosystem  
25 II preparation from the thermophilic cyanobacterium *Thermosynechococcus vulcanus*.  
26 *Plant Cell Physiol* 43:1366-1373.
- 27 47. Wittig I, Karas M, & Schagger H (2007) High resolution clear native electrophoresis for  
28 in-gel functional assays and fluorescence studies of membrane protein complexes. *Mol*  
29 *Cell Proteomics* 6(7):1215-1225.
- 30 48. Bern M, Kil YJ, & Becker C (2012) Byonic: Advanced peptide and protein identification  
31 software. *Curr Protoc Bioinformatics* CHAPTER: Unit13.20.
- 32 49. Zhang J, *et al.* (2012) PEAKS DB: de novo sequencing assisted database search for  
33 sensitive and accurate peptide identification. *Mol Cell Proteomics* 11(4).
- 34 50. Zhang Z & Marshall AG (1998) A Universal Algorithm for Fast and Automated Charge  
35 State Deconvolution of Electrospray Mass-to-Charge Ratio Spectra. *Journal of the*  
36 *American Society for Mass Spectrometry* 9:225-233.
- 37 51. Niedzwiedzki DM, Jiang J, Lo CS, & Blankenship RE (2013) Low-temperature  
38 spectroscopic properties of the peridinin-chlorophyll *a*-protein (PCP) complex from the  
39 coral symbiotic dinoflagellate *Symbiodinium*. *Journal of Physical Chemistry B*  
40 117:11091-11099.
- 41 52. Hofrichter J & Henry ER (1992) Singular value decomposition: Application to analysis  
42 of experimental data. *Methods in Enzymology* 210:129-192.
- 43 53. van Stokkum IH, Larsen DS, & van Grondelle R (2004) Global and target analysis of  
44 time-resolved spectra. *Biochim Biophys Acta* 1657(2-3):82-104.

- 1 54. Kozlov AG, Shinn MK, Weiland EA, & Lohman TM (2017) Glutamate promotes SSB  
2 protein-protein interactions via intrinsically disordered regions. *Journal of Molecular*  
3 *Biology* 429:2790-2801.
- 4 55. Schuck P & Dam J (2004) Calculating sedimentation coefficient distributions by direct  
5 modeling of sedimentation velocity concentration profiles. *Methods in Enzymology*  
6 384:185-212.
- 7 56. Niedziela-Majka A, Maluf NK, Antony E, & Lohman TM (2011) Self-Assembly of  
8 *Escherichia coli* MutL and its complexes with DNA. *Biochemistry* 50:7868-7880.
- 9 57. Vistica J, *et al.* (2004) Sedimentation equilibrium analysis of protein interactions with  
10 global implicit mass conservation constraints and systematic noise decomposition. *Anal*  
11 *Biochem* 326:234-256.
- 12 58. Schneider CA, Rasband WS, & Eliceiri KW (2012) NIH Image to ImageJ: 25 years of  
13 image analysis. *Nat Methods* 9:671-675.
- 14

## 1 FIGURE LEGENDS

### 2 **Fig. 1. Isolation and characterization of a novel PSII subcomplex (NRC).**

3 (A) Clear Native PAGE of His-CP47-tagged PSII complexes from the His47 and  $\Delta psbO$ -His47  
4 strains. M, PSII monomer; D, PSII dimer. The arrow indicates the unknown band that was  
5 characterized further. (B) Green bands corresponding to the NRC complex and PSII monomer (M)  
6 formed following ultracentrifugation of His-CP47-tagged PSII samples in a 5-30% linear glycerol  
7 gradient from the His47 and  $\Delta psbO$ -His47 strains. Pixel intensity (plotted as inverse of gray value  
8 computed in ImageJ (58) is shown on the left of the His47 gradient. The red curve shows the  
9 zoomed-in view of the region corresponding to the NRC band. (C) Steady-state absorption spectra  
10 of PSII-M and PSII-NRC at 77 K. To enable comparison, spectra were normalized to unity at the  
11 maximum of the Soret band (417 nm). The arrow shows a small peak visible in the spectrum of  
12 PSII-M that corresponds to the Q<sub>x</sub> band of pheophytin *a* present in the PSII reaction center, and  
13 which is missing in the NRC spectrum.

14

### 15 **Fig. 2. Major protein components of NRC.**

16 (A) SDS-PAGE analysis of PSII-M and PSII-NRC samples from the  $\Delta psbO$ -His47 strain, and of  
17 PSII-M purified identically from the His47 strain. (B) Immunoblot analysis of PSII-M and PSII-  
18 NRC samples from the His47 strain. (C) Immunoblot analysis of PSII-M and PSII-NRC samples  
19 from the  $\Delta psbO$ -His47 strain.

### 20 **Fig. 3. Mass spectra of the intact, low-molecular-mass subunits in $\Delta O$ -NRC (A, upper 21 spectrum) and $\Delta O$ -PSII-M (A, lower spectrum) and summary table of the results (B).**

22 Most unlabeled peaks in the spectra correspond to additional charge states or oxidation products of  
23 labeled subunits. Subunits labeled in black afforded roughly comparable signal intensities in both  
24 samples; subunits labeled in blue (PsbE, PsbF, PsbI) were not observed in the NRC spectrum.  
25 Mod., modification; Form., formylation; -8 N-term., protein is cleaved after Alanine-8; -M1, loss  
26 of N-terminal methionine. See Fig. S3 for zoomed-in spectra of each subunit and comparison with  
27 theoretical spectra. MS/MS analysis was performed separately on each subunit (see Materials and  
28 Methods and Tables S4-S5) to confirm the identification, and example fragment ions are shown in  
29 (B). Mass accuracy of all MS/MS ions shown was  $\leq 0.01$  Da.

30 **Fig. 4. (A) Relative distribution of components in  $\Delta O$ -PSII-NRC (red) and  $\Delta O$ -PSII-M (blue)  
31 samples based on Svedberg coefficient (S), and (B) MW determination of the NRC complex  
32 from sedimentation equilibrium analysis.** For experimental and calculation details, see  
33 “Materials and Methods.”

34 **Fig. 5. Time-resolved fluorescence of  $\Delta O$ -PSII-NRC and  $\Delta O$ -PSII-M samples.** (A, B) 2D  
35 pseudo-color fluorescence decay profiles at 77 K upon excitation at 625 nm. (C, D) Global analysis  
36 results of TRF datasets. Dashed profiles (Fluo) correspond to time-integrated spectra and mimic  
37 steady-state fluorescence spectra. All profiles were normalized at their maxima for better  
38 comparability. (E) Example kinetic traces at 682 nm (maximum of fluorescence emission from  
39 CP47/CP43) accompanied with fitted traces from global analysis. Substantial shortening of  
40 fluorescence decay of the  $\Delta O$ -PSII-M sample is associated with rapid excitation energy transfer  
41 from antenna into the PSII core. The different signal rise observed in the two traces originates from

1 different temporal resolutions of time windows in which data were collected. EAFS – evolution  
2 associated fluorescence spectra.

3 **Fig. 6. Schematic of the PSII life cycle based on previous findings (reviewed in (14, 18, 33,**  
4 **36) and current results, focusing on the proposed positioning of the NRC complex.** NRC may  
5 form during *de novo* synthesis (upper green arrows), during the repair cycle (red arrows), or both.  
6 Red D1, damaged version of D1; light red D2, slightly less frequently damaged version of D2. In  
7 a given RC\* complex, either D1, D2, or both may be damaged. Several intermediary stages in the  
8 life cycle are omitted for clarity; e.g., after damage, PsbO, PsbU, PsbV, and PsbQ dissociate (36),  
9 Psb27 rebinds (21), and the complex monomerizes (36) before the proposed NRC formation step.  
10 Black text and red-green coloring represent steps common to both *de novo* synthesis and repair.



## FIGURES

Figure 1

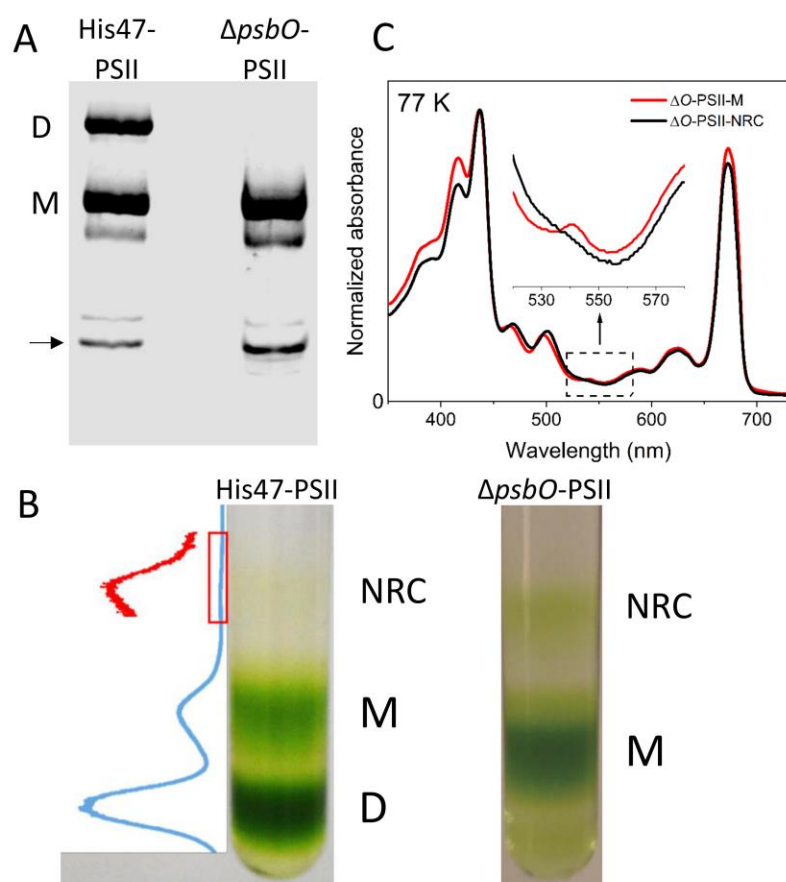

**Figure 2**

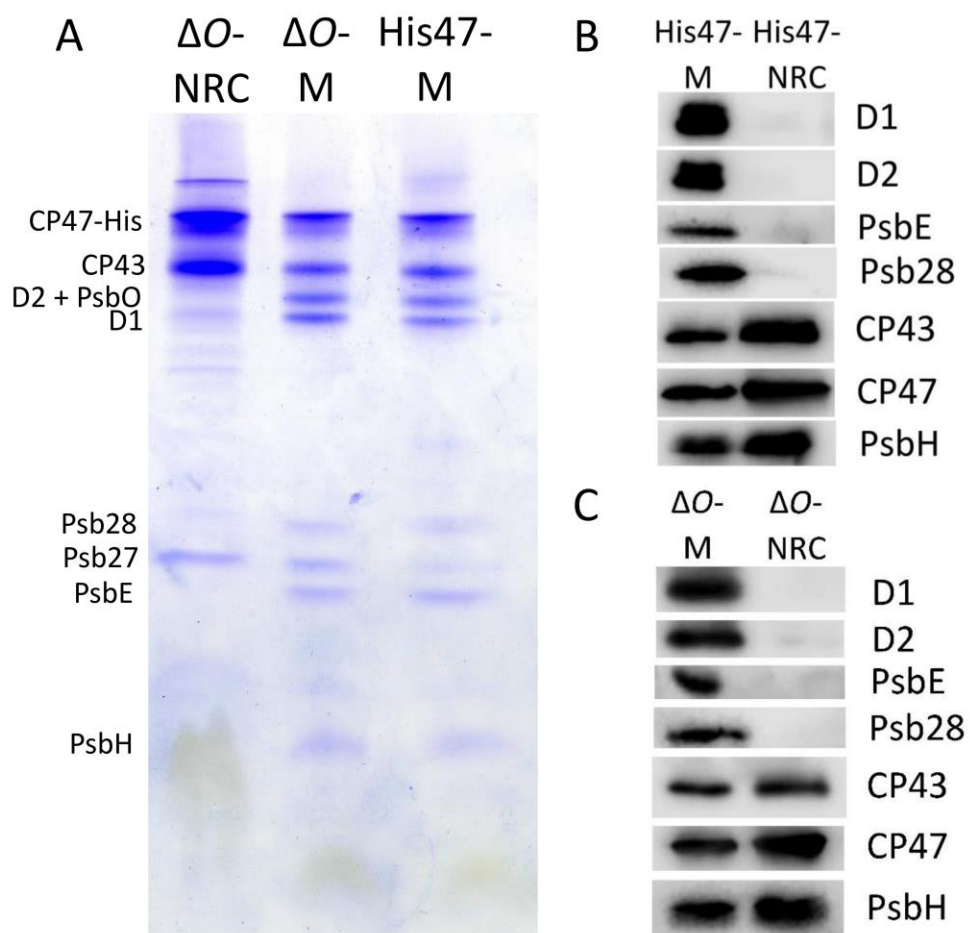

**Figure 3**

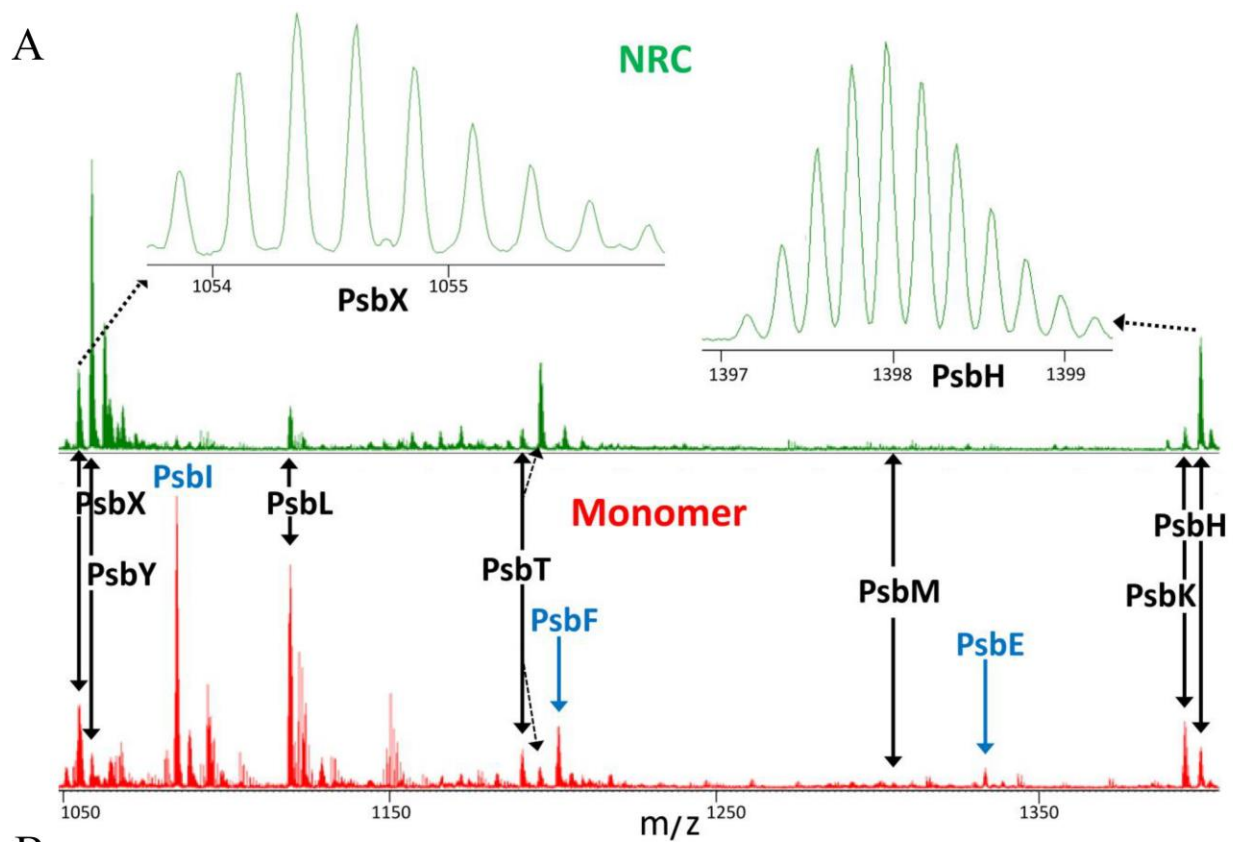

**B**

| Protein | PSII Monomer | NRC | Observed mass (Da) | Calculated mass (Da) | Mass accuracy (ppm) | Mod.      | Example MS/MS ions observed (m/z)                |
|---------|--------------|-----|--------------------|----------------------|---------------------|-----------|--------------------------------------------------|
| PsbT    | ✓            | ✓   | 3565.93            | 3565.94              | 1                   | Form.     | $y_{24}^{2+}$ : 1373.29, $y_{20}^{2+}$ : 1160.15 |
| PsbM    | ✓            | ✓   | 3907.15            | 3907.15              | <1                  | Form.     | --                                               |
| PsbK    | ✓            | ✓   | 4174.34            | 4174.33              | 2                   | -8 N Ter. | $b_{18}^{+}$ : 1205.62, $b_{24}^{+}$ : 1842.00   |
| PsbX    | ✓            | ✓   | 4211.39            | 4211.37              | 4                   | Form.     | $y_{18}^{2+}$ : 987.57, $y_{11}^{+}$ : 1322.74   |
| PsbY    | ✓            | ✓   | 4227.35            | 4227.34              | 3                   | Form.     | $y_{21}^{2+}$ : 1075.60, $y_{26}^{2+}$ : 1346.75 |
| PsbI    | ✓            | —   | 4331.35            | 4331.34              | 3                   | Form.     | $y_{22}^{2+}$ : 1265.64, $y_{26}^{2+}$ : 1480.77 |
| PsbL    | ✓            | ✓   | 4470.35            | 4470.35              | <1                  | None      | $b_{27}^{3+}$ : 1022.55, $b_{30}^{3+}$ : 1112.28 |
| PsbF    | ✓            | —   | 4798.56            | 4798.56              | 1                   | -M1       | $y_{11}^{+}$ : 1205.64, $y_{14}^{+}$ : 1598.85   |
| PsbH    | ✓            | ✓   | 6980.75            | 6980.75              | <1                  | -M1       | $b_{33}^{3+}$ : 1150.62, $b_{22}^{2+}$ : 1184.17 |
| PsbE    | ✓            | —   | 9311.65            | 9311.64              | 1                   | -M1       | $b_{26}^{3+}$ : 935.48, $b_{34}^{3+}$ : 1278.34  |

**Figure 4**

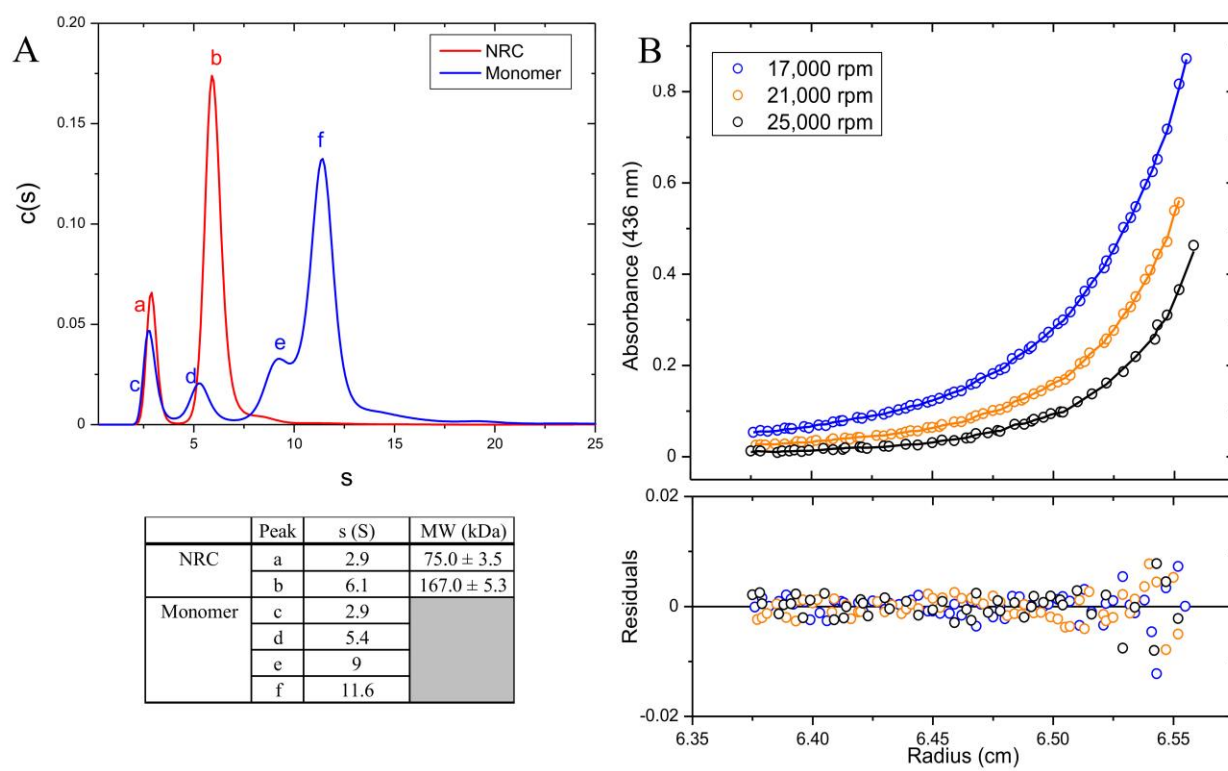

**Figure 5**

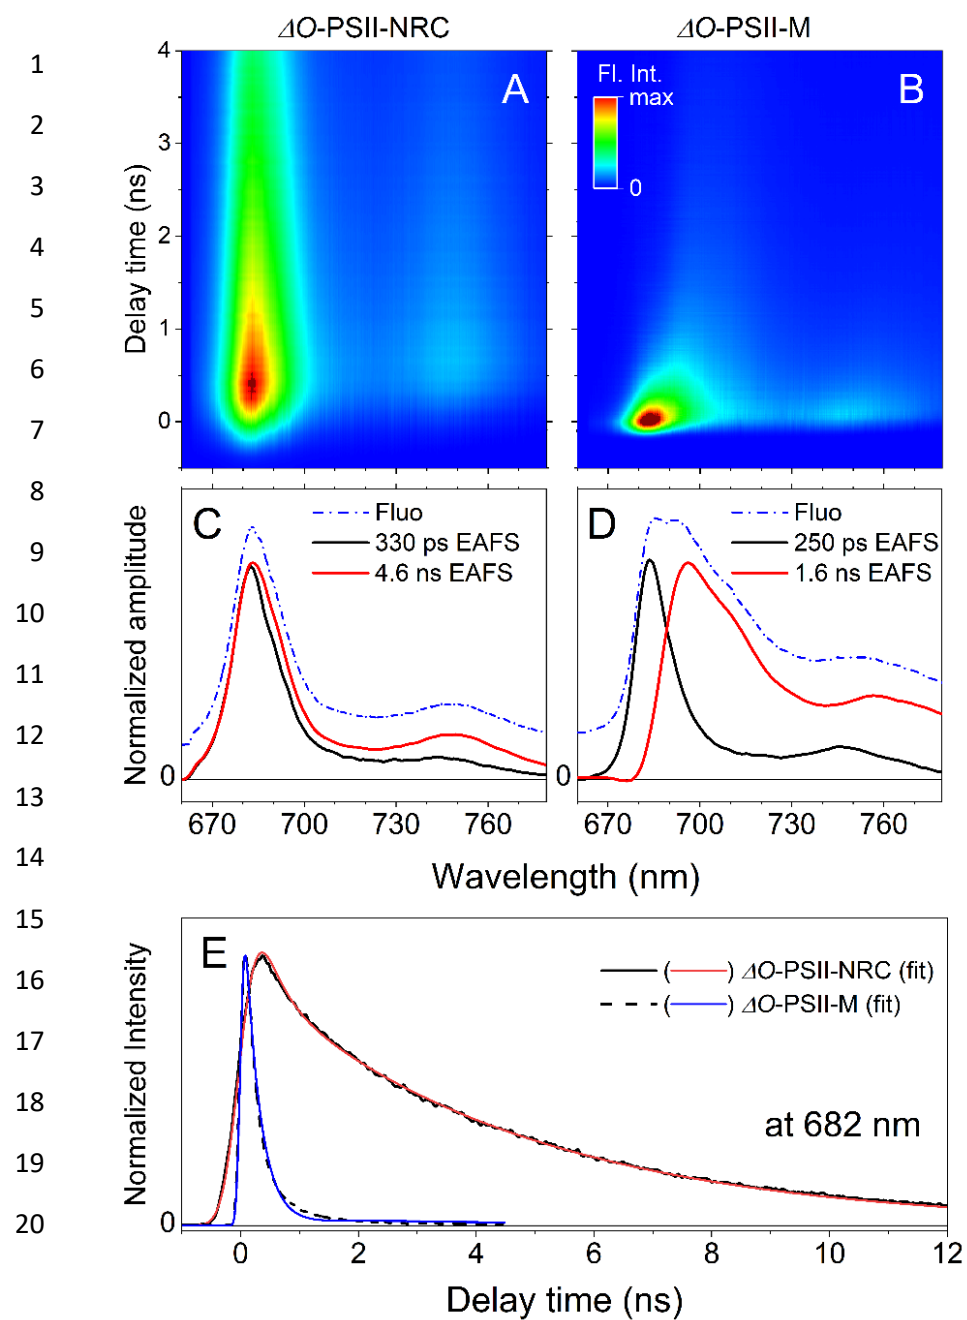

Figure 6

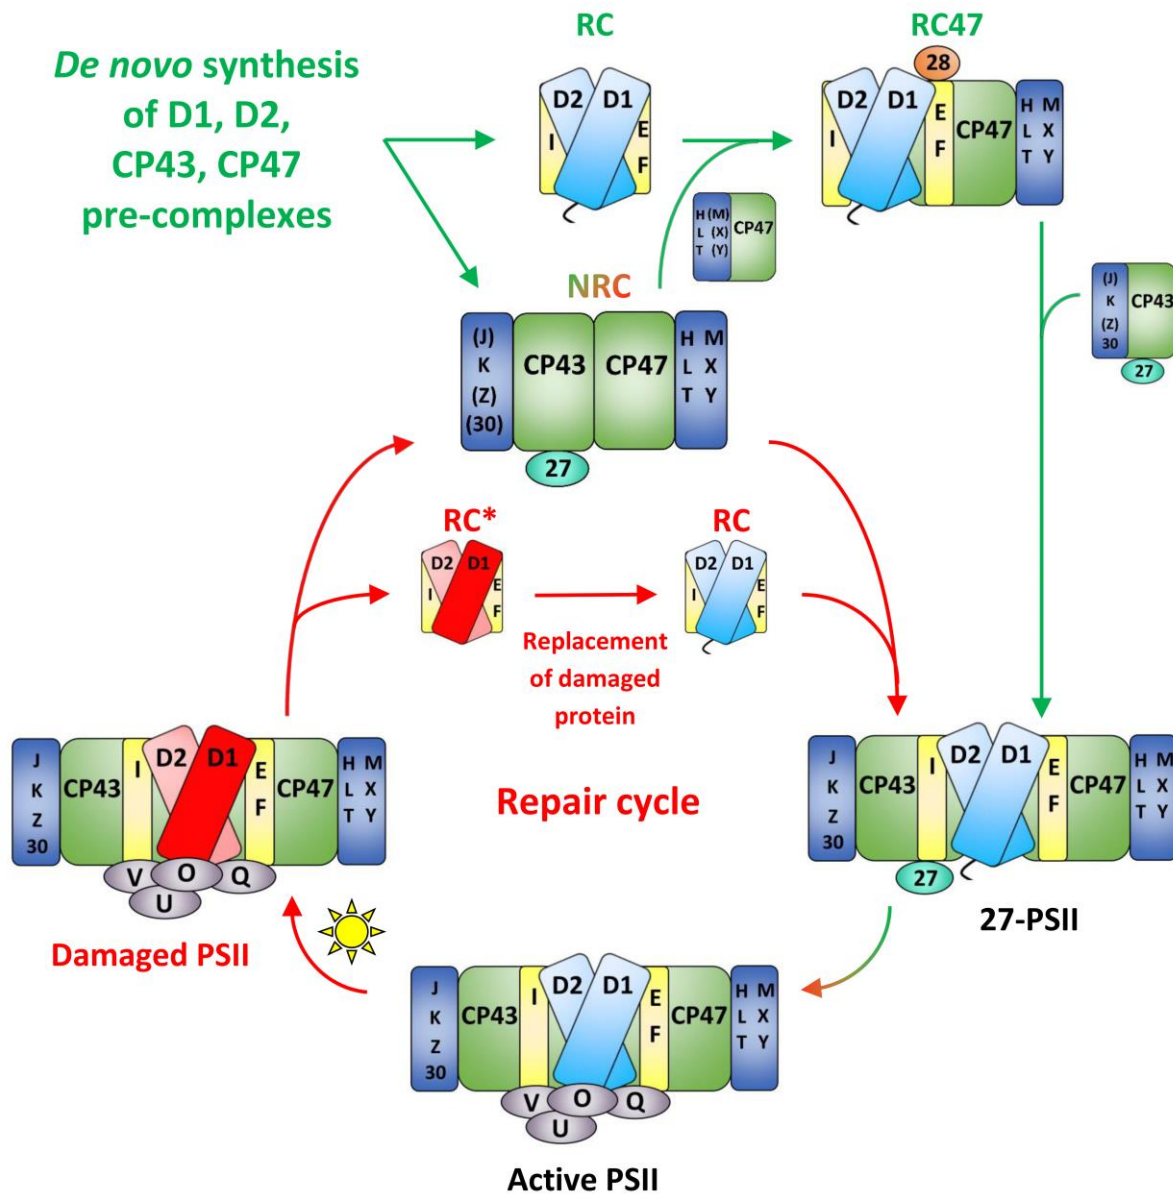



## SUPPLEMENTARY FIGURE LEGENDS

1 **Fig. S1. Model of the PSII life cycle based on previous findings [reviewed in (14, 18, 33, 36)].**  
2 Several intermediary stages in the life cycle are omitted for clarity; *e.g.*, dimerization of active  
3 PSII; and after damage, dissociation of PsbO, PsbU, PsbV, and PsbQ (36), Psb27 rebinding (21),  
4 and monomerization of the complex (36) before the RC47 formation step. In this model, the  
5 damaged RC47 complex serves as the site of D1 replacement. Red D1, damaged D1; RC47\*,  
6 damaged RC47. Green arrows and text represent *de novo* synthesis steps; red arrows and text  
7 represent repair cycle steps. Black text and the red-green arrow represent steps common to both  
8 processes.

9 **Fig. S2. CN PAGE of isolated PSII complexes.** Clear Native polyacrylamide gel of  $\Delta psbO$ -PSII  
10 and purified NRC from glycerol gradient of  $\Delta psbO$ -PSII. The chlorophyll-containing NRC band  
11 co-migrates with the unknown band in the PSII sample.  
12

13 **Fig. S3. LMM components of PSII complexes.** Mass spectra of the intact LMM subunits  
14 identified in PSII-M (bottom spectrum for each subunit), NRC (middle), and the theoretical  
15 spectrum (top) of each subunit, with protein modifications as listed in Fig. 3.

16

Fig. S1

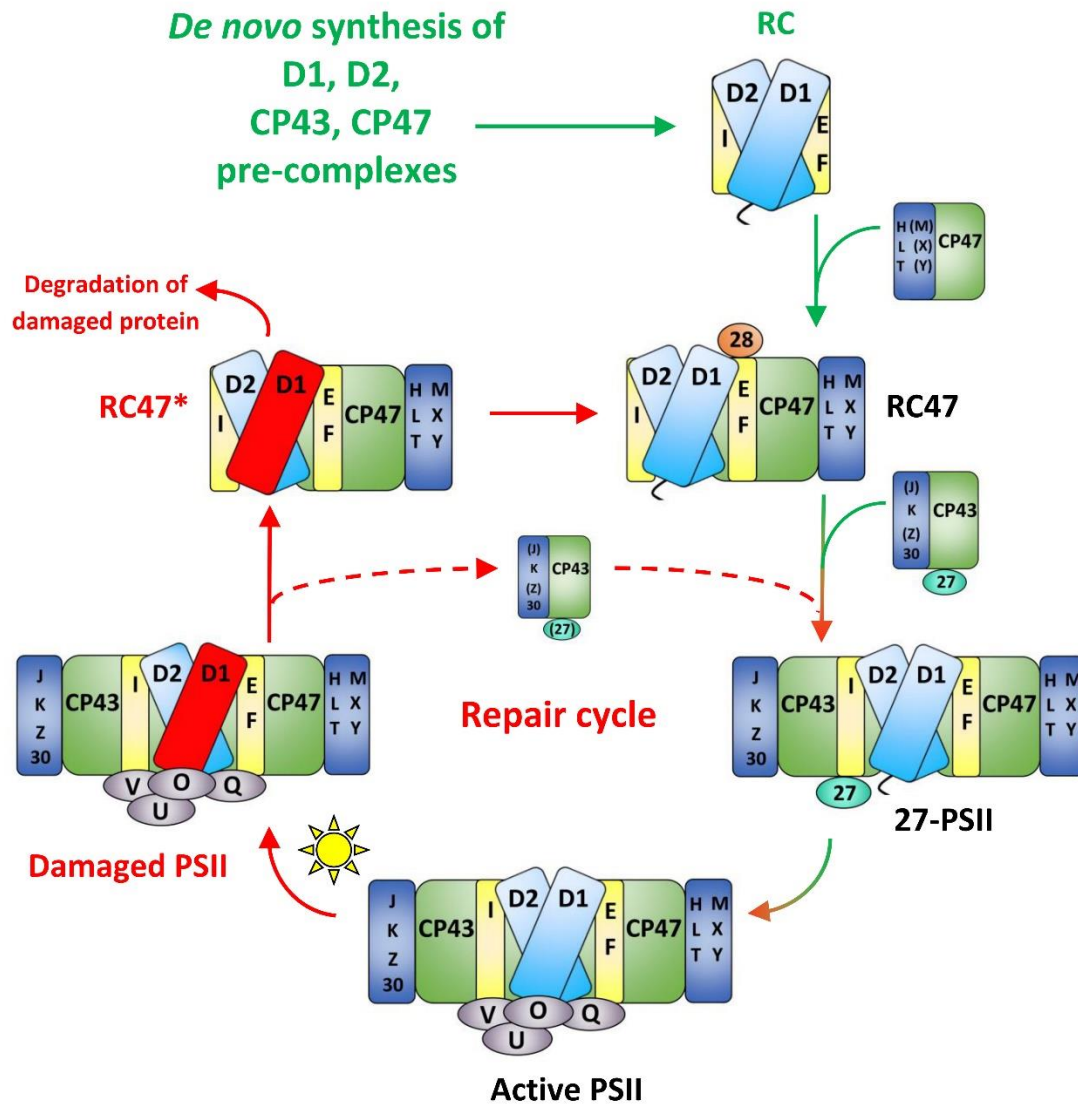

**Fig. S2**

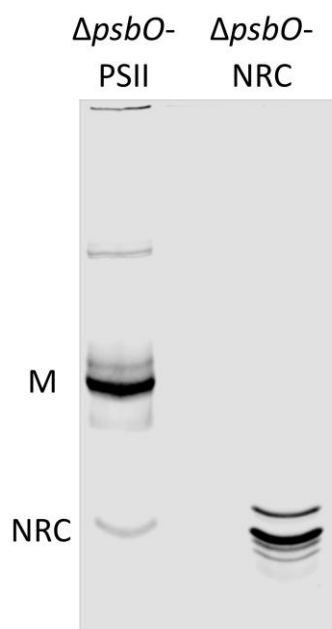

**Fig. S3**

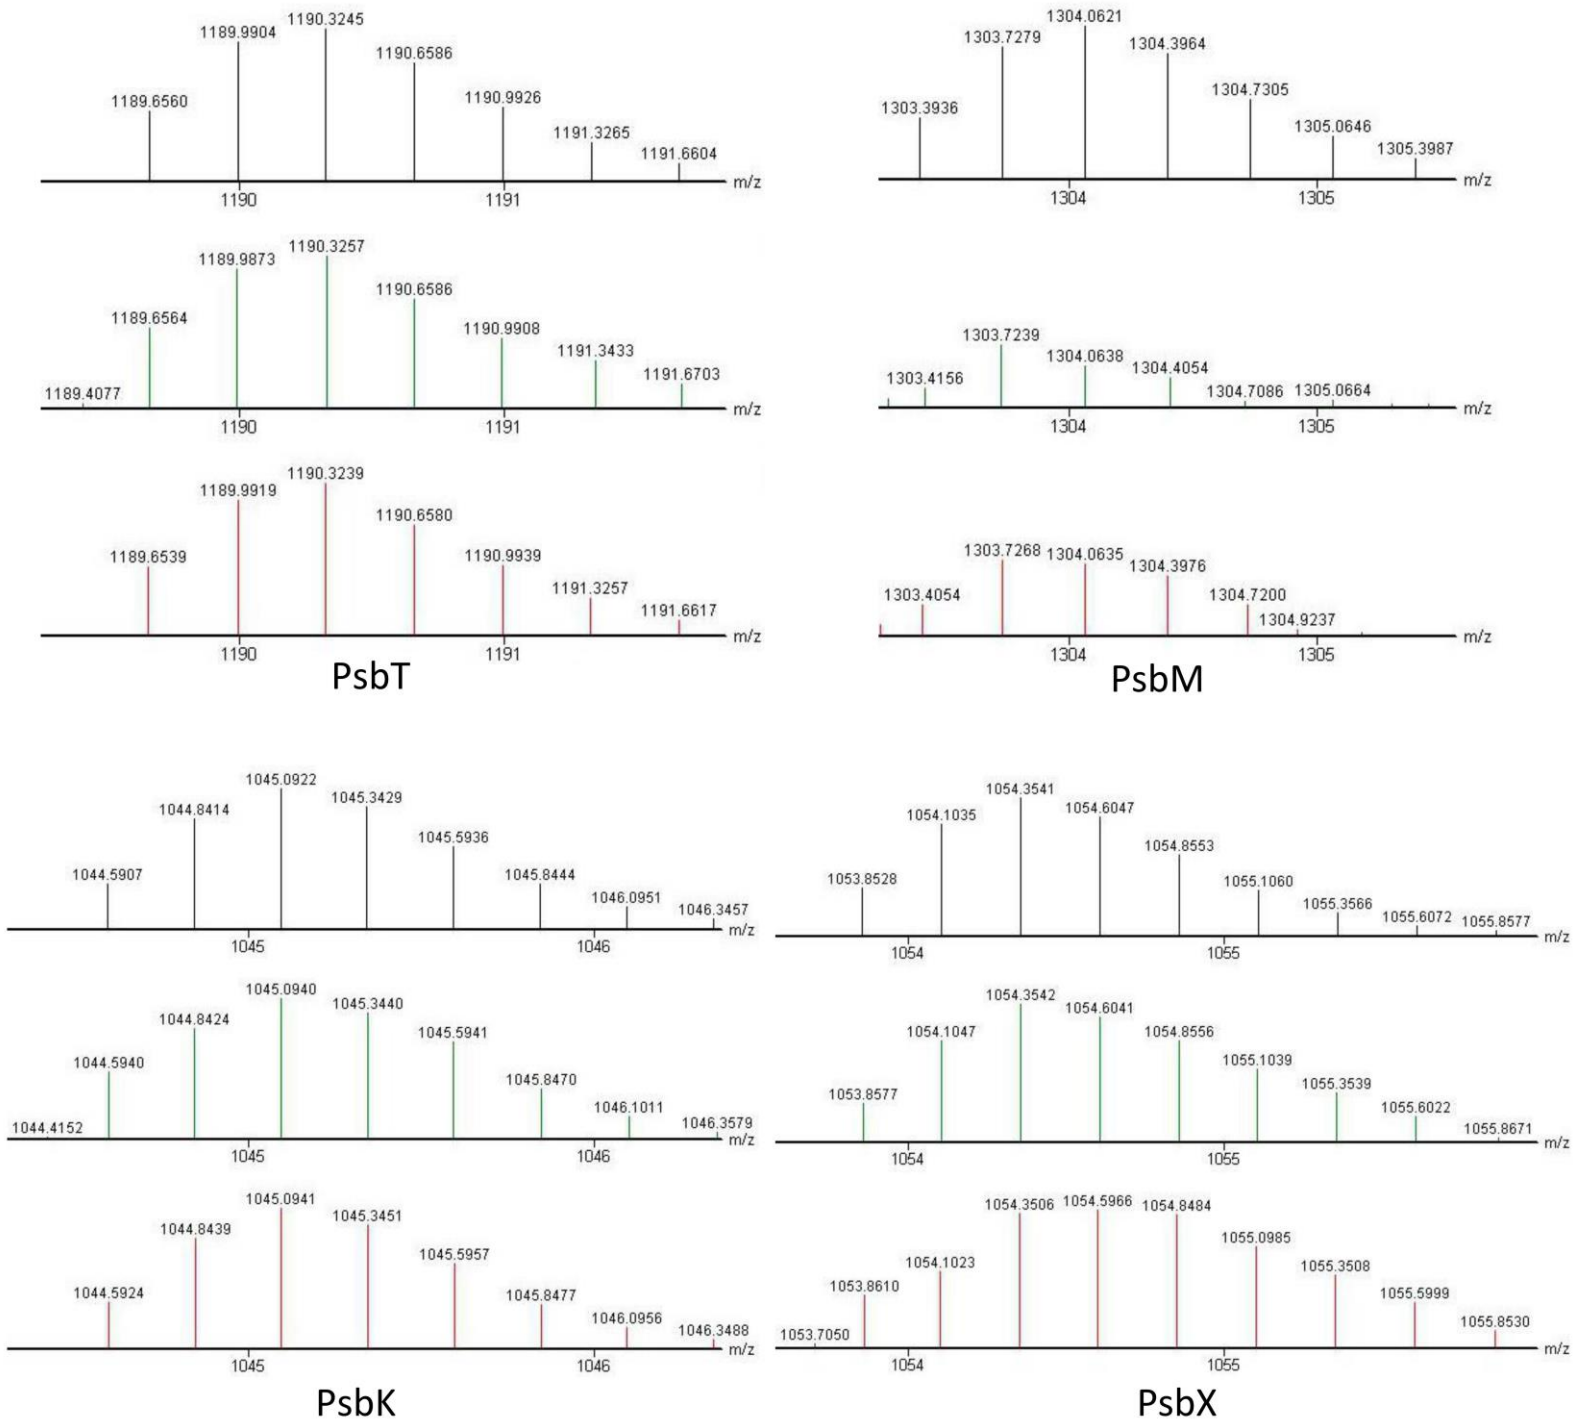

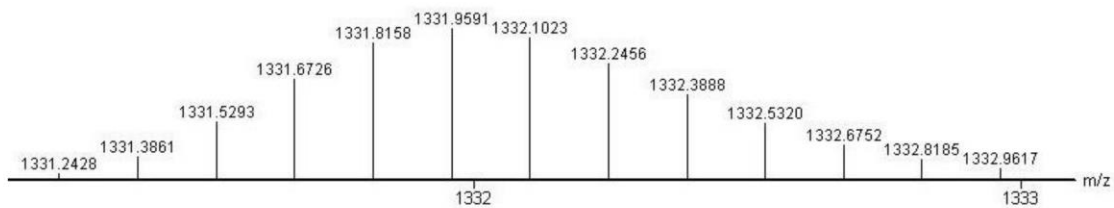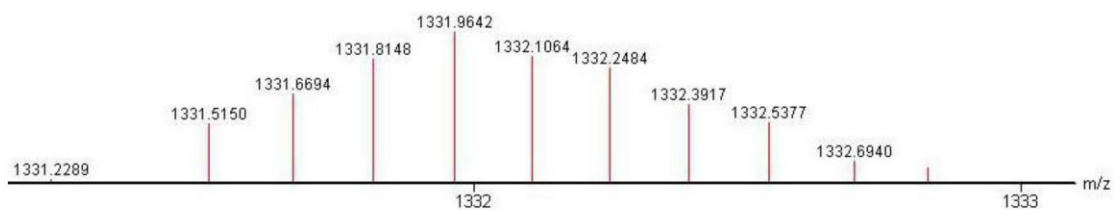

### PsbE

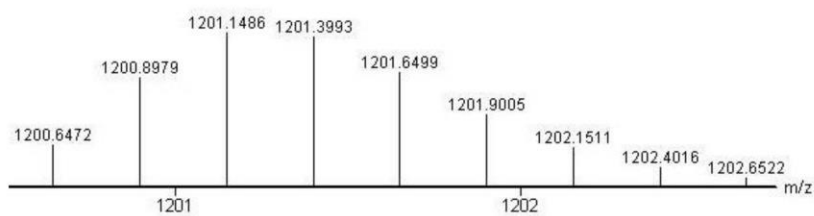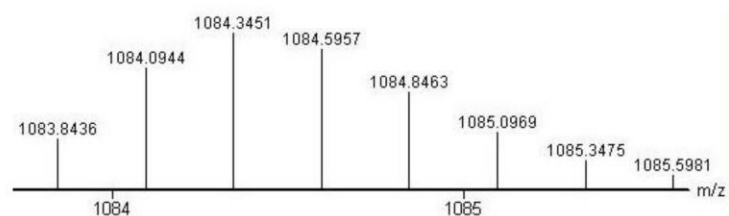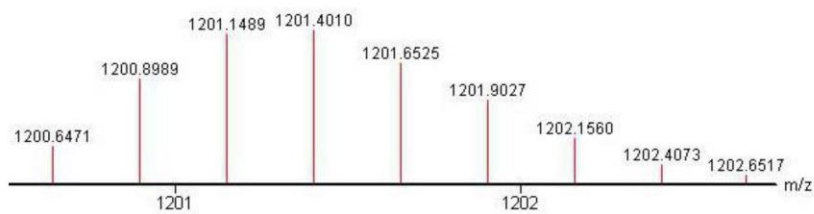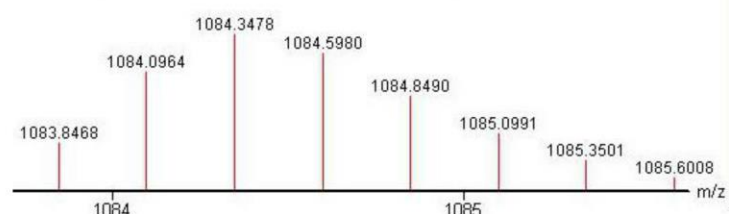

### PsbF

### PsbI
